# Supplementary material
Source: Royal Society of Chemistry journal article supplement (doi:10.1039/d5lc01200g)
Supplement: d5lc01200g1.pdf [file d5lc01200g1.pdf]

Supplementary Information for  
**Selective On-chip DNA Synthesis using Electric-Field-  
assisted PCR**

Doyeon Lim<sup>1</sup>, and Youngjun Song<sup>1,2\*</sup>

<sup>1</sup> Department of Nano-Bioengineering, Incheon National University, 119 Academy-ro, Incheon, 22012, Republic of Korea

<sup>2</sup> Standard Bioelectronics. Co., 511 Michuhol tower hall tower Gaetbeol-ro 12, Incheon, 21999, Republic of Korea

\*Corresponding author E-mails: Y.Song (yjunsong.inu@stdbioelec.com)

**Table 1.** Comparison of electric field-based platforms

| <b>Parameter</b>                                 | <b>Heller et al.<br/>(26)</b>        | <b>Song et al.<br/>(30)</b>          | <b>Wong &amp; Melosh<br/>(31)</b>    | <b>Lim et al.<br/>(38)</b>                           | <b>This work</b>                                                    |
|--------------------------------------------------|--------------------------------------|--------------------------------------|--------------------------------------|------------------------------------------------------|---------------------------------------------------------------------|
| <b>Electric field role</b>                       | Accumulation,<br>hybridization       | Positioning                          | Hybridization,<br>melting            | DNA Hybridization                                    | Immobilization,<br>hybridization,<br>synthesis                      |
| <b>Binding strategy</b>                          | Indirect polymer<br>permeation layer | Indirect polymer<br>permeation layer | Direct thiol-Au<br>linkage           | Direct SAM<br>(cysteamine-Au)                        | Direct SAM<br>(cysteamine-Au)                                       |
| <b>Electric field-assisted<br/>DNA synthesis</b> | N/A                                  | N/A                                  | N/A                                  | No                                                   | Yes<br>(Klenow fragment)                                            |
| <b>Application</b>                               | Genotyping,<br>SNP detection         | DNA memory,<br>computing             | Drug delivery,<br>cellular signaling | Biosensor platform,<br>molecular detection<br>system | DNA data storage,<br>synthetic biology,<br>molecular<br>diagnostics |

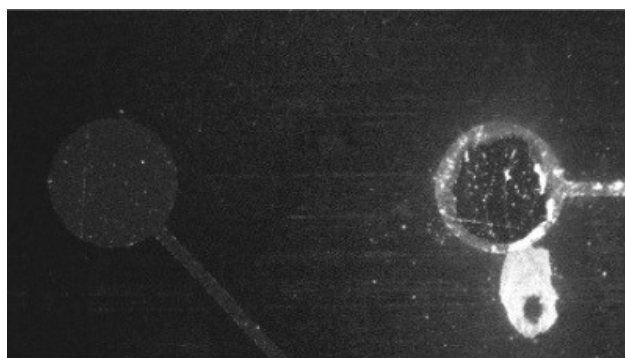

**Figure S1.** Fluorescence microscopy image DNA-immobilized gold electrodes after continuous 2.0V application for 30min.

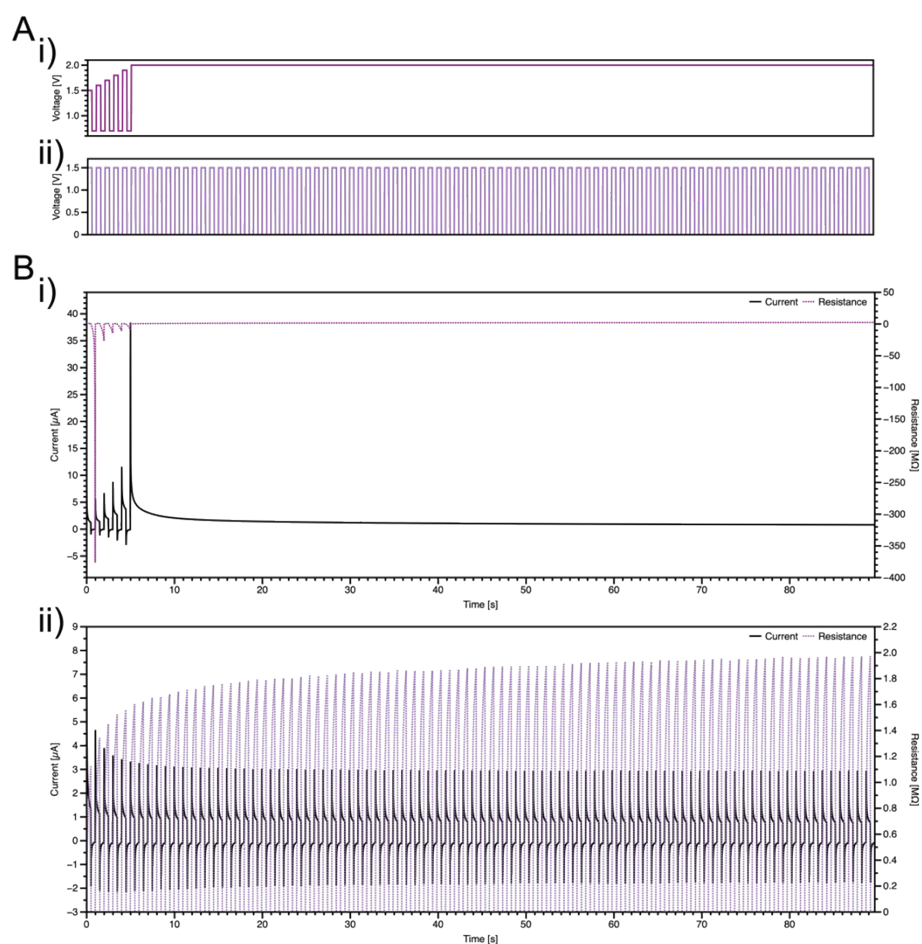

**Figure S2.** (A) Voltage profile over longer time periods for i) Pattern I (step-increase voltage from 0.5 V to 2.0 V and 0.5 V offset) and ii) Pattern II (pulsed alternating voltage between 0 V and 1.5 V at 0.5 s intervals). (B) Current and resistance profile of Pattern I and Pattern II.
